# Supplementary material
Source: Springer Nature journal article supplement (https://www.springermedizin.de/resource/supplementary/12872_2014_829_MOESM1_ESM.pdf/9430614)

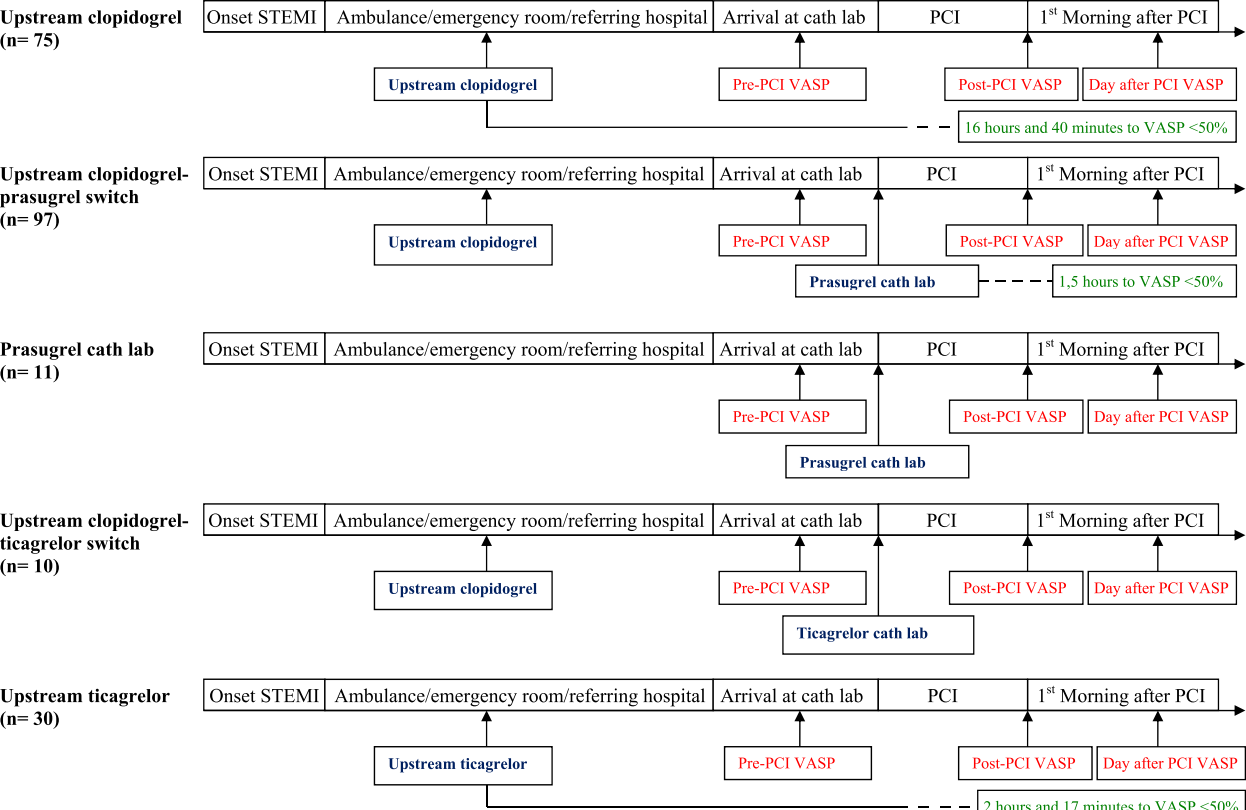

Supplement: MOESM1 [file 9430614]
